# Supplementary material
Source: publisher site journal article supplement (https://www.spandidos-publications.com/6425/downloadSupplementary)

Figure S1. PDME does not affect the viability of endothelial cells. HUVECs viability was evaluated in PDME-treated cells according to the indicated concentration for 24 h. Data are presented as the mean  $\pm$  SEM and statistically analyzed using t-test; n.s, not significant PDME 10  $\mu$ g/ml vs. PDME 0  $\mu$ g/ml. PDME, *P. dindygulensis* methanol extracts; HUVECs, human umbilical vein endothelial cells.

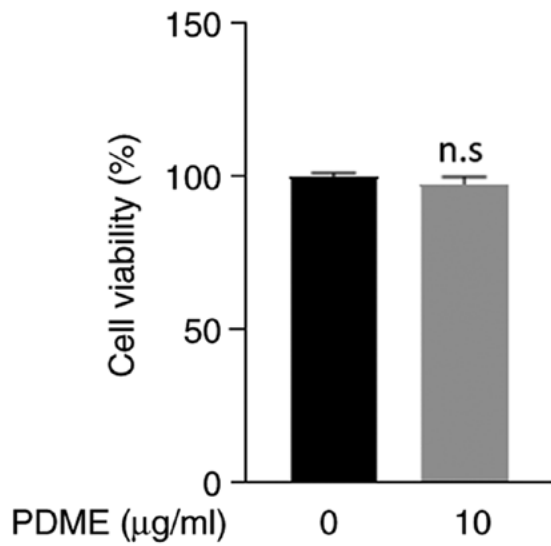

Figure S2. PDME induces HO-1 expression and reduces LPS-mediated iNOS and COX-2 expression in U937 cells. (A) Differentiated U937 cells treated with PDME indicated concentration for 24 h and HO-1 protein expression determined using western blotting. (B) The cells were treated with PDME (10  $\mu\text{g/ml}$ ) for the indicated time and HO-1 protein expression was determined using western blotting. (C) Differentiated U937 cells were pre-treated with PDME (10  $\mu\text{g/ml}$ ) for 30 min and treated with LPS (1  $\mu\text{g/ml}$ ) for 24 h. Next, the protein expression of iNOS and COX-2 was determined using western blotting. For control, the solution used for extraction and dilution was treated in equal amounts. PDME, *P. dindygulensis* methanol extracts; HO-1, heme oxygenase 1; LPS, lipopolysaccharides; COX-2, cyclooxygenins-2; iNOS, inducible nitric oxide synthase.

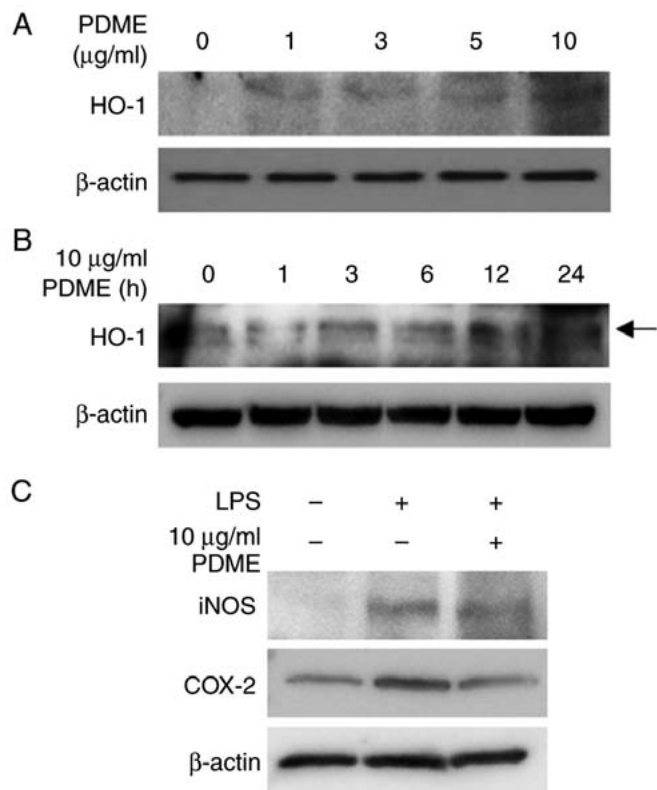

Figure S3. PDME reduces LPS-mediated iNOS and COX-2 expression. RAW246.7 cells were pre-treated with PDME (10  $\mu\text{g/ml}$ ) for 30 min and treated with LPS (1  $\mu\text{g/ml}$ ) for 6 h. For control, the solution used for extraction and dilution was treated in equal amounts. Next, the protein expression of iNOS and COX-2 was determined using western blotting. PDME, *P. dindygulensis* methanol extracts; LPS, lipopolysaccharides; iNOS, inducible nitric oxide synthase; COX-2, cyclooxygenins-2.

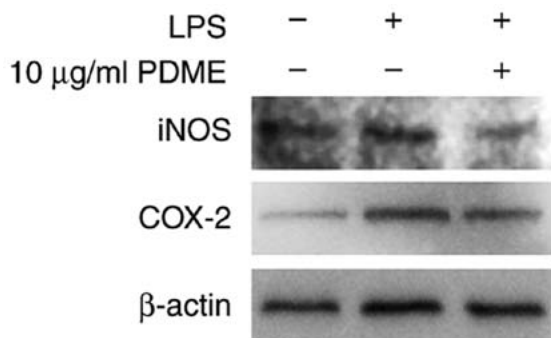

Supplement: Supplementary file 1 [file downloadSupplementary]
